# Supplementary material
Source: PubMed Central journal article supplement (PMC5750119)
Supplement: NIHMS901825-supplement-1.pdf [file NIHMS901825-supplement-1.pdf]

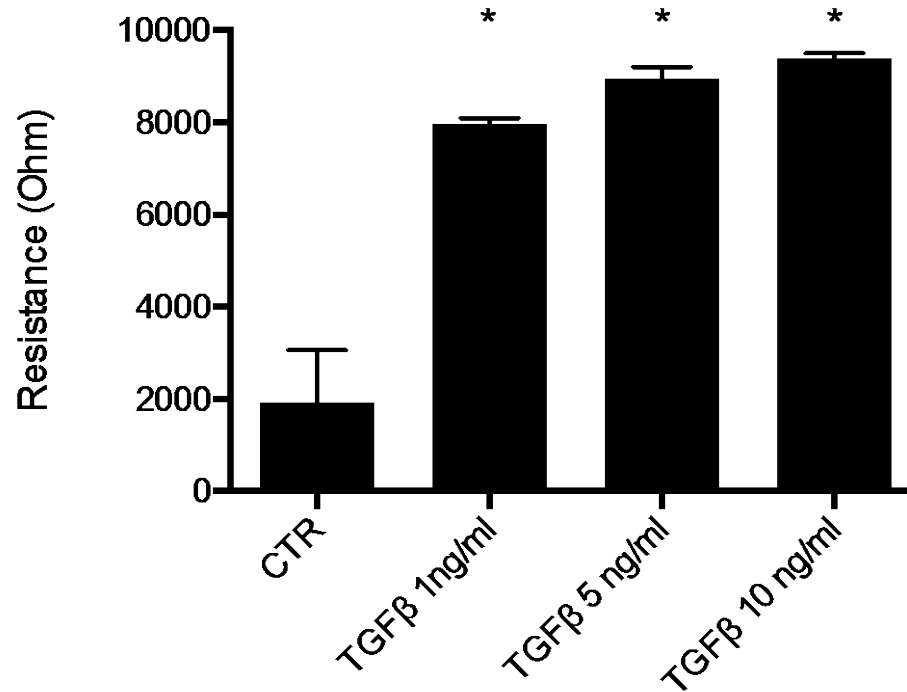

**Supplemental Figure 1. Transepithelial resistance of mpkCCD cells after TGFβ treatment.** TGFβ significantly increased the resistance of dDAVP-treated mpkCCD cells at all TGFβ concentrations. These data show that the cells retained their junctional barrier after treatment with TGFβ and undergo some unknown regulatory process that decreases junctional or transcellular ion permeability.
